# Supplementary material for: Distribution of Functional CD4 and CD8 T cell Subsets in Blood and Rectal Mucosal Tissues
Source: PubMed Central journal article supplement (PMC6502862; doi:10.1038/s41598-019-43311-6), 2019-05-06
Supplement: 41598_2019_43311_MOESM1_ESM.pdf [file 41598_2019_43311_MOESM1_ESM.pdf]

## Distribution of Functional CD4 and CD8 T cell Subsets in Blood and Rectal Mucosal Tissues

Praveen Kumar Amancha\*<sup>1</sup>, Cassie G. Ackerley\*<sup>1</sup>, Chandni Duphare<sup>2</sup>, Mark Lee<sup>2</sup>, Yi-Juan Hu<sup>3</sup>, Rama R. Amara<sup>2</sup> and Colleen F. Kelley<sup>1</sup>

Figure S1: Representative FACS plots for intracellular cytokine staining assays. The no stimulation control (NS) and PMA/Ionomycin stimulated profile is shown here on CD4 (left) and on CD8 (right).

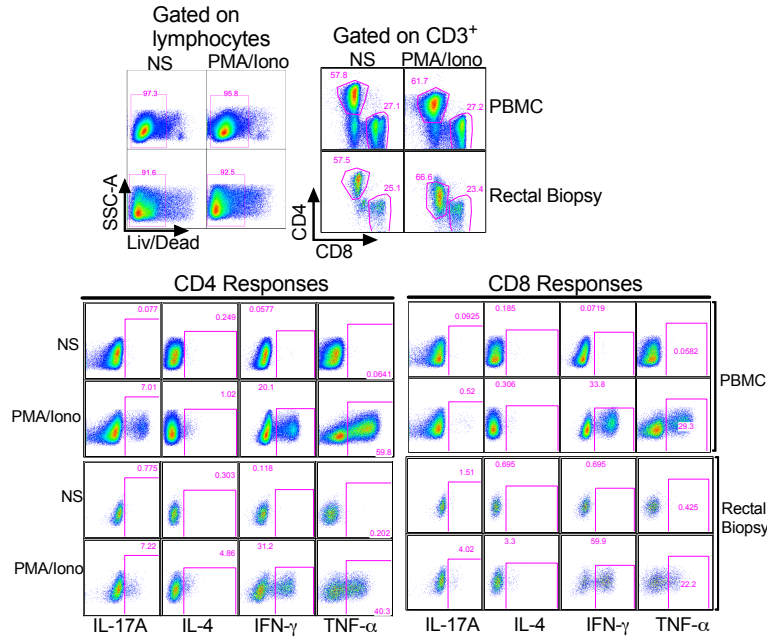

Table S1: Correlation analysis of polyfunctional Th17 and Tc17 populations and HIV target cell populations in the RM of HIV negative men

|                                                                                                                  | Memory CD4 <sup>+</sup> CCR5 <sup>+</sup> | Memory CD4 <sup>+</sup> Ki67 <sup>+</sup> | Memory CD4 <sup>+</sup> CD38 <sup>+</sup> | Memory CD4 <sup>+</sup> $\alpha$ 4 $\beta$ 7 <sup>+</sup> Ki67 <sup>+</sup> |
|------------------------------------------------------------------------------------------------------------------|-------------------------------------------|-------------------------------------------|-------------------------------------------|-----------------------------------------------------------------------------|
| Total CD4 <sup>+</sup> IL17A <sup>+</sup>                                                                        | ns                                        | ns                                        | ns                                        | ns                                                                          |
| CD4 <sup>+</sup> IL17A <sup>+</sup> IFN- $\gamma$ <sup>neg</sup> TNF- $\alpha$ <sup>neg</sup> IL4 <sup>neg</sup> | * (r= -0.33, p=0.03)                      | ns                                        | ns                                        | ns                                                                          |
| CD4 <sup>+</sup> IL17A <sup>+</sup> IFN- $\gamma$ <sup>+</sup> TNF- $\alpha$ <sup>neg</sup> IL4 <sup>neg</sup>   | ns                                        | ns                                        | ns                                        | ns                                                                          |
| CD4 <sup>+</sup> IL17A <sup>+</sup> TNF- $\alpha$ <sup>+</sup> IFN- $\gamma$ <sup>neg</sup> IL4 <sup>neg</sup>   | ns                                        | ns                                        | ns                                        | ns                                                                          |
| CD4 <sup>+</sup> IL17A <sup>+</sup> IFN- $\gamma$ <sup>+</sup> TNF- $\alpha$ <sup>+</sup> IL4 <sup>neg</sup>     | ns                                        | ** (r= 0.41, p=0.006)                     | ns                                        | ** (r= 0.48, p=0.001)                                                       |
| CD4 <sup>+</sup> IL17A <sup>+</sup> IL4 <sup>+</sup> IFN- $\gamma$ <sup>neg</sup> TNF- $\alpha$ <sup>neg</sup>   | ns                                        | ns                                        | ns                                        | ns                                                                          |
| CD4 <sup>+</sup> IL17A <sup>+</sup> IL4 <sup>+</sup> IFN- $\gamma$ <sup>+</sup> TNF- $\alpha$ <sup>neg</sup>     | ns                                        | ns                                        | ns                                        | ns                                                                          |
| CD4 <sup>+</sup> IL17A <sup>+</sup> IL4 <sup>+</sup> TNF- $\alpha$ <sup>+</sup> IFN- $\gamma$ <sup>neg</sup>     | ns                                        | ns                                        | ns                                        | ns                                                                          |
| CD4 <sup>+</sup> IL17A <sup>+</sup> IL4 <sup>+</sup> IFN- $\gamma$ <sup>+</sup> TNF- $\alpha$ <sup>+</sup>       | ns                                        | ns                                        | ns                                        | ns                                                                          |
|                                                                                                                  |                                           |                                           |                                           |                                                                             |
|                                                                                                                  | RM_CD4MemCCR5                             | RM_CD4 MemKi67                            | RM_CD4 MemCD38                            | RM_CD4 Mema4b7_Ki67                                                         |
| Total CD8 <sup>+</sup> IL17A <sup>+</sup>                                                                        | ns                                        | * (r= -0.54, p=0.02)                      | ns                                        | ns                                                                          |
| CD8 <sup>+</sup> IL17A <sup>+</sup> IFN- $\gamma$ <sup>neg</sup> TNF- $\alpha$ <sup>neg</sup> IL4 <sup>neg</sup> | ns                                        | ns                                        | ns                                        | * (r= -0.50, p=0.03)                                                        |
| CD8 <sup>+</sup> IL17A <sup>+</sup> IFN- $\gamma$ <sup>+</sup> TNF- $\alpha$ <sup>neg</sup> IL4 <sup>neg</sup>   | ns                                        | ns                                        | ns                                        | ns                                                                          |
| CD8 <sup>+</sup> IL17A <sup>+</sup> TNF- $\alpha$ <sup>+</sup> IFN- $\gamma$ <sup>neg</sup> IL4 <sup>neg</sup>   | ns                                        | ns                                        | ns                                        | * (r= 0.51, p=0.02)                                                         |
| CD8 <sup>+</sup> IL17A <sup>+</sup> IFN- $\gamma$ <sup>+</sup> TNF- $\alpha$ <sup>+</sup> IL4 <sup>neg</sup>     | ns                                        | ns                                        | ns                                        | * (r= 0.52, p=0.02)                                                         |
| CD8 <sup>+</sup> IL17A <sup>+</sup> IL4 <sup>+</sup> IFN- $\gamma$ <sup>neg</sup> TNF- $\alpha$ <sup>neg</sup>   | ns                                        | ns                                        | ns                                        | * (r= -0.57, p=0.01)                                                        |
| CD8 <sup>+</sup> IL17A <sup>+</sup> IL4 <sup>+</sup> IFN- $\gamma$ <sup>+</sup> TNF- $\alpha$ <sup>neg</sup>     | ns                                        | ns                                        | ns                                        | * (r= -0.514, p=0.03)                                                       |
| CD8 <sup>+</sup> IL17A <sup>+</sup> IL4 <sup>+</sup> TNF- $\alpha$ <sup>+</sup> IFN- $\gamma$ <sup>neg</sup>     | ns                                        | ns                                        | ns                                        | ns                                                                          |
| CD8 <sup>+</sup> IL17A <sup>+</sup> IL4 <sup>+</sup> IFN- $\gamma$ <sup>+</sup> TNF- $\alpha$ <sup>+</sup>       | ns                                        | ns                                        | ns                                        | ns                                                                          |
